# Supplementary material for: Setting the course: aligning European Union marine pollution policy ambitions with environmental realities
Source: Frontiers journal article supplement (doi:10.3389/fmars.2025.1586918), 2025-06-16
Supplement: Table_1.xlsx [file Table_1.xlsx]

## Sheet: EU list - Policy documents
The table includes only legislation that is still in force and policy documents that explicitly reference the selected pollutants (as outlined in Table 1). Consequently, some regulations that may seem relevant at first glance (e.g., the Environmental Noise Directive) have been reviewed but are not included. Amendments to existing legislation are generally not listed separately unless they are rec…
DIRECTIVES
Policy area	Competent authority	Legal value	Document Name	Year	Plastic	UW noise	PFAS	Nutrients	PCB
Soil and Land	DG ENV	Yes	Directive 86/278/ECC on the protection of the environment, and in particular of the soil, when sewage sludge is used in agriculture	1986				x
Water	DG ENV	Yes	Directive 91/271/EEC concerning urban waste water treatment	1991	x			x
Soil and Land and Water	DG ENV	Yes	Directive 91/676/ECC on the protection of waters against pollution caused by nitrates from agricultural sources	1991				x
Nature and biodiversity	DG ENV	Yes	Directive 92/43/ECC on the conservation of natural habitats and of wild fauna and flora	1992		x
Plastic	DG ENV	Yes	Directive 94/62/EC on packaging and packaging waste	1994	x
Chemicals	DG ENV	Yes	Directive 96/59/EC of 16 September 1996 on the disposal of polychlorinated biphenyls and polychlorinated terphenyls (PCB/PCT)	1996					x
Soil and Land	DG ENV	Yes	Directive 1999/31/EC on the landfill of waste	1999	x
Water	DG ENV	Yes	Directive 2000/60/EC on establishing a framework for Community action in the field of water policy	2000			x	x	x
Coastal environment	EU	Yes	Directive 2005/35/EC on ship-source pollution and on the introduction of penalties for infringements (NOTE: the amending Directive (EU) 2024/3101 is relevant here – not yet incorporated into the consolidated version)	2005	x
Water	DG ENV	Yes	Directive 2006/7/EC concerning the management of bathing water quality	2006	x			x
Marine and coastal environment	DG ENV	Yes	Directive 2008/56/EC establishing a framework for community action in the field of marine environmental policy (Marine Strategy Framework Directive)	2008	x	x	x	x	x
Water	DG ENV	Yes	Directive 2008/98/EC on waste and repealing certain directives	2008	x		x		x
Chemicals and Water	DG ENV	Yes	Directive 2008/105/EC on environmental quality standards in the field of water policy	2008			x		x
Nature and biodiversity	DG ENV	Yes	Directive 2009/14/EC on the conservation of wild birds	2009			x		x
Industrial emissions	DG ENV	Yes	Directive 2010/75/EU on industrial emissions (integrated pollution prevention and control)	2010	x		x	x	x
All	DG ENV	Yes	Directive 2011/92/EU on the assessment of the effects of certain public and private projects on the environment	2011	x	x	x		x
Industrial emissions	DG ENV	Yes	Directive (EU) 2016/2284 on the reduction of national emissions of certain atmospheric pollutants	2016				x	x
Circular Economy	DG MOVE	Yes	Directive (EU) 2019/883 on port reception facilities for the delivery of waste from ships	2019	x
Plastic	DG ENV	Yes	Directive (EU) 2019/904 on the reduction of the impact of certain plastic products on the environment	2019	x		x
Water	DG ENV	Yes	Directive (EU) 2020/2184 on the quality of water intended for human consumption	2020	x		x
Coastal environment	EU	Yes	Directive (EU) 2024/3101 amending Directive 2005/35/EC as regards ship-source pollution and on the introduction of administrative penalties for infringements (NOTE: Amendments not yet included in consolidated version on Eurlex)	2024	x
REGULATIONS
Policy area	Competent authority	Legal value	Document Name	Year	Plastic	UW noise	PFAS	Nutrients	PCB
Chemicals	DG ENTR and DG ENV	Yes	Regulation (EC) No 1907/2006 concerning the Registration, Evaluation, Authorisation and Restriction of Chemicals (REACH), establishing a European Chemicals Agency	2006			x		x
Chemicals	DG ENV	Yes	Regulation (EC) No 1013/2006 on shipments of waste	2006	x		x		x
Circular economy, Soil and Land	DG GROW	Yes	Regulation (EU) 2019/1009 laying down rules on the making available on the market of EU fertilising products	2019	x			x	x
Chemicals	DG ENV	Yes	Regulation (EU) 2019/1021 on persistent organic pollutants	2019			x		x
Clean mobility and energy efficiency	DG ENER	Yes	Regulation (EU) 2020/740 on the labelling of tyres with respect to fuel efficiency and other parameters	2020	x
Soil and Land	DG AGRI	Yes	Regulation (EU) 2021/2115 establishing rules on support for strategic plans to be drawn up by Member States under the common agricultural policy (CAP Strategic Plans) and financed by the European Agricultural Guarantee Fund (EAGF) and by the European Agricultural Fund for Rural Development (EAFRD)	2021				x
Food	DG SANTE	Yes	Regulation (EU) 2023/915 on maximum levels for certain contaminants in food	2023				x	x
Industrial emissions	EU	Yes	Regulation (EU) 2024/1244 on reporting of environmental data from industrial installations, establishing an Industrial Emissions Portal	2024			x		x
Environment	EU	Yes	Regulation (EU) 2024/1991 on nature restoration and amending Regulation (EU) 2022/869	2024	x	x	x	x	x
DECISIONS
Policy area	Competent authority	Legal value	Document Name	Year	Plastic	UW noise	PFAS	Nutrients	PCB
All	DG ENV	Yes	Decision No 1386/2013/EU on a General Union Environment Action Programme to 2020 ‘Living well, within the limits of our planet’	2013	x	x	x	x	x
Marine and coastal environment	DG ENV	Yes	Decision (EU) 2017/848 laying down criteria and methodological standards on good environmental status of marine waters and specifications and standardised methods for monitoring and assessment	2017	x	x	x	x	x
Plastic, Marine and Coastal Environment	DG MARE	Yes	Implementing Decision (EU) 2021/958 laying down the format for reporting data and information on fishing gear placed on the market and waste fishing gear collected in Member States and the format for the quality check report in accordance with Articles 13(1)(d) and 13(2) of Directive (EU) 2019/904	2021	x
All	DG ENV	Yes	Decision (EU) 2022/591 on a General Union Environment Action Programme to 2030	2022			x		x
COMMUNICATIONS
Policy area	Competent authority	Legal value	Document Name	Year	Plastic	UW noise	PFAS	Nutrients	PCB
Plastic	DG ENV	No	COM (2013) 123 - GREEN PAPER On a European Strategy on Plastic Waste in the Environment	2013	x				x
Circular Economy; Plastic;	DG ENV	No	COM (2018) 28 - A European Strategy for Plastics in a Circular Economy	2018	x
All	EC, Secretariat General	No	COM (2019) 640 - The European Green Deal	2019	x		x	x	x
Circular Economy	DG ENV	No	COM (2020) 98 - A new Circular Economy Action Plan for a cleaner and more competitive Europe	2020	x		x		x
Marine and coastal environment	DG ENV	No	COM (2020) 259 – Report on the implementation of the Marine Strategy Framework Directive (Directive 2008/56/EC)	2020	x	x	x	x	x
Nature and biodiversity	DG ENV	No	COM (2020) 380 - EU Biodiversity Strategy for 2030: Bringing nature back into our lives	2020	x	x	x	x	x
All	DG SANTE	No	COM (2020) 381 - A Farm to Fork Strategy for a fair, healthy and environmentally-friendly food system	2020			x	x
Chemicals	DG ENV	No	COM (2020) 667 - Chemicals Strategy for Sustainability - Towards a toxic-free environment	2020			x		x
Noise	DG MOVE	No	COM (2020) 789 - Sustainable and Smart Mobility Strategy – putting European transport on track for the future	2020		x
Fisheries	DG MARE	No	COM (2021) 236 - Strategic guidelines for a more sustainable and competitive EU aquaculture for the period 2021 to 2030	2021				x	x
Marine and coastal environment	DG MARE	No	COM (2021) 240 - On a new approach for a sustainable blue economy in EU. Transforming the EU's Blue Economy for a sustainable future	2021	x			x
Chemicals, Soil and Land, Nature and biodiversity	DG ENV	No	COM (2021) 400 - Pathway to a healthy planet for all - EU Action Plan: 'Towards zero pollution for air, water and soil’	2021	x	x	x	x	x
Chemicals	DG ENV	No	COM (2021) 408 - On the review and update of the third European Union Implementation Plan in accordance with Article 9(4) of Regulation (EU) 2019/1021 on persistent organic pollutants	2021	x		x		x
Soil and Land	DG ENV	No	COM (2021) 699 - EU Soil Strategy for 2030 - Reaping the benefits of healthy soils for people, food, nature and climate	2021	x		x	x
Soil and Land and Water	DG ENV	No	COM (2021) 1000 - Report on the implementation of Council Directive 91/676/EEC concerning the protection of waters against pollution caused by nitrates from agricultural sources based on Member State reports for the period 2016-2019	2021				x
All	DG ENV	No	COM (2022) 141 - EU Strategy for Sustainable and Circular Textiles	2022	x		x
Chemicals	DG ENV	No	COM (2022) 540 - Proposal for a directive amending Directive 2000/60/EC establishing a framework for Community action in the field of water policy, Directive 2006/118/EC on the protection of groundwater against pollution and deterioration and Directive 2008/105/EC on environmental quality standards in the field of water policy	2022	x		x	x	x
Fisheries	DG MARE	No	COM (2023) 102 - EU Action Plan: Protecting and restoring marine ecosystems for sustainable and resilient fisheries	2023	x	x		x
Fisheries	DG MARE	No	COM (2023) 103 - The Common Fisheries Policy today and tomorrow: a Fisheries and Oceans Pact towards sustainable, science-based, innovative and inclusive fisheries management	2023	x	x		x
All	EU	No	COM (2023) 645 - Proposal for a Regulation on preventing plastic pellet losses to reduce microplastic pollution	2023	x
STAFF WORKING DOCUMENTS
Policy area	Competent authority	Legal value	Document Name	Year	Plastic	UW noise	PFAS	Nutrients	PCB
Marine and coastal environment	DG ENV	No	SWD (2020) 61 - Review of the status of the marine environment in the European Union - Towards clean, healthy and productive oceans and seas accompanying COM (2020) 259	2020	x	x	x	x	x
Chemicals	DG ENV	No	SWD (2020) 249 - Poly- and Perfluoroalkyl substances (PFAS) accompanying COM (2020) 667	2020			x
Chemicals	DG ENV	No	SWD (2020) 250 - Progress report on the assessment and management of combined exposures to multiple chemicals (chemical mixtures) and associated risks accompanying COM (2020) 667	2020	x		x		x
All	DG ENV	No	SWD (2021) 140 - Digital Solutions for Zero Pollution accompanying COM (2021) 400	2021	x			x
All	DG ENV	No	SWD (2021) 141 - Towards a monitoring and outlook framework for the zero pollution ambition accompanying COM (2021) 400	2021	x	x	x	x	x
Chemicals	DG ENV	No	SWD (2021) 201 - EU Implementation Plan for the Stockholm Convention on persistent organic pollutants accompanying the Report on the review and update of the third European Union Implementation Plan in accordance with Article 9(4) of Regulation (EU) 2019/1021 on persistent organic pollutants	2021	x		x		x
Chemicals	DG ENV	No	SWD (2022) 540 – Accompanying COM (2022) 540	2022	x		x	x	x
Fisheries	DG MARE	No	SWD (2023) 103 - Common Fisheries Policy - State of play accompanying COM (2023) 103	2023	x		x	x	x
REPORTS
Policy area	Competent authority	Legal value	Document Name	Year	Plastic	UW noise	PFAS	Nutrients	PCB
Soil and Land, Water and Agriculture	DG AGRI	No	DG AGRI - Final report on the Evaluation of the impact of the CAP on Water	2019			x	x	x
Marine and coastal environment	DG RTD	No	DG RTD – Proposed Mission: Mission Starfish 2030: Restore our ocean and waters by 2030	2020	x	x	x	x
All	DG ENV	No	DG ENV - Strategic Plan 2022-2024 - Environment	2020	x	x	x	x	x
All	DG RTD	No	DG RTD - European Missions: Restore our Ocean and Waters by 2030 - Implementation Plan	2021	x	x	x	x	x
All	DG RTD	No	DG RTD - European Missions: A Soil Deal for Europe – 100 living labs and lighthouses to lead the transition towards healthy soils by 2030 - Implementation Plan	2021	x		x	x	x
Marine and coastal environment	MSFD Expert Network on Contaminants	No	JRC Technical Report - Development and implementation of marine contaminant threshold values	2022			x	x	x
OTHER
Policy area	Competent authority	Legal value	Document Name	Year	Plastic	UW noise	PFAS	Nutrients	PCB
Chemicals	DG ENV and DG SANTE	No	Commission Recommendation on the monitoring of perfluoro alkylated substances in food (2010/161/EU)	2010			x		x
All	CoR-ENVE	No	2022/C 270/06 Opinion of the EC of the Regions - EU Action Plan: ‘Towards zero pollution for air, water and soil’	2021	x		x	x	x
Marine and coastal environment	DG ENV	No	C/2024/1268 - Communication from the Commission - Commission Notice on the threshold values set under the Marine Strategy Framework Directive 2008/56/EC and Commission Decision (EU) 2017/848	2024	x	x		x
